# Supplementary material for: Regulation by cyclic di-GMP attenuates dynamics and enhances robustness of bimodal curli gene activation in Escherichia coli
Source: PubMed Central journal article supplement (PMC10212085; doi:10.1371/journal.pgen.1010750), 2023-05-15
Supplement: pgen.1010750.s001.pdf [file pgen.1010750.s001.pdf]

**S1 Table. *E. coli* strains and plasmids used in this study.**

| Strains         | Relevant genotype                                                                                                                            | Reference |
|-----------------|----------------------------------------------------------------------------------------------------------------------------------------------|-----------|
| W3110           | W3110 derivative with functional RpoS                                                                                                        | [1]       |
| VS1146          | W3110 <i>csgA::csgA_RBS_sfgfp</i>                                                                                                            | [2]       |
| VS1857          | VS1146 $\Delta mlrA$                                                                                                                         | This work |
| VS1732          | VS1146 $\Delta pdeH$                                                                                                                         | This work |
| VS1720          | VS1146 $\Delta dgcE$                                                                                                                         | This work |
| VS1258          | VS1146 $\Delta pdeR$                                                                                                                         | This work |
| VS1257          | VS1146 $\Delta dgcM$                                                                                                                         | This work |
| VS1717          | VS1146 $\Delta pdeH \Delta dgcE$                                                                                                             | This work |
| VS1713          | VS1146 $\Delta pdeR \Delta dgcM$                                                                                                             | This work |
| VS1885          | VS1146 $\Delta pdeH \Delta dgcE \Delta pdeR$                                                                                                 | This work |
| VS1729          | VS1146 $\Delta pdeH \Delta dgcE \Delta pdeR \Delta dgcM$                                                                                     | This work |
| <b>Plasmids</b> |                                                                                                                                              |           |
| pTrc99a         | Expression vector; <i>P<sub>trc</sub></i> promoter inducible by isopropyl- $\beta$ -D-thiogalactopyranoside (IPTG); pBR ori; Ap <sup>R</sup> | [3]       |
| pVS2689         | pTrc99a:: <i>pdeH</i>                                                                                                                        | This work |
| pVS1644         | pTrc99a:: <i>dgcE</i>                                                                                                                        | This work |

**References**

1. Serra DO, Richter AM, Klauck G, Mika F, Hengge R. Microanatomy at cellular resolution and spatial order of physiological differentiation in a bacterial biofilm. *mBio*. 2013;4: e00103-13. PMID: 23512962.
2. Besharova O, Suchanek VM, Hartmann R, Drescher K, Sourjik V. Diversification of gene expression during formation of static submerged biofilms by *Escherichia coli*. *Front Microbiol*. 2016;7: 1568. PMID: 27761132.
3. Amann E, Ochs B, Abel K-J. Tightly regulated tac promoter vectors useful for the expression of unfused and fused proteins in *Escherichia coli*. *Gene*. 1988;69: 301-15. PMID: 3069586.
