# Supplementary material for: Regulation by cyclic di-GMP attenuates dynamics and enhances robustness of bimodal curli gene activation in Escherichia coli
Source: PubMed Central journal article supplement (PMC10212085; doi:10.1371/journal.pgen.1010750), 2023-05-15
Supplement: pgen.1010750.s002.pdf [file pgen.1010750.s002.pdf]

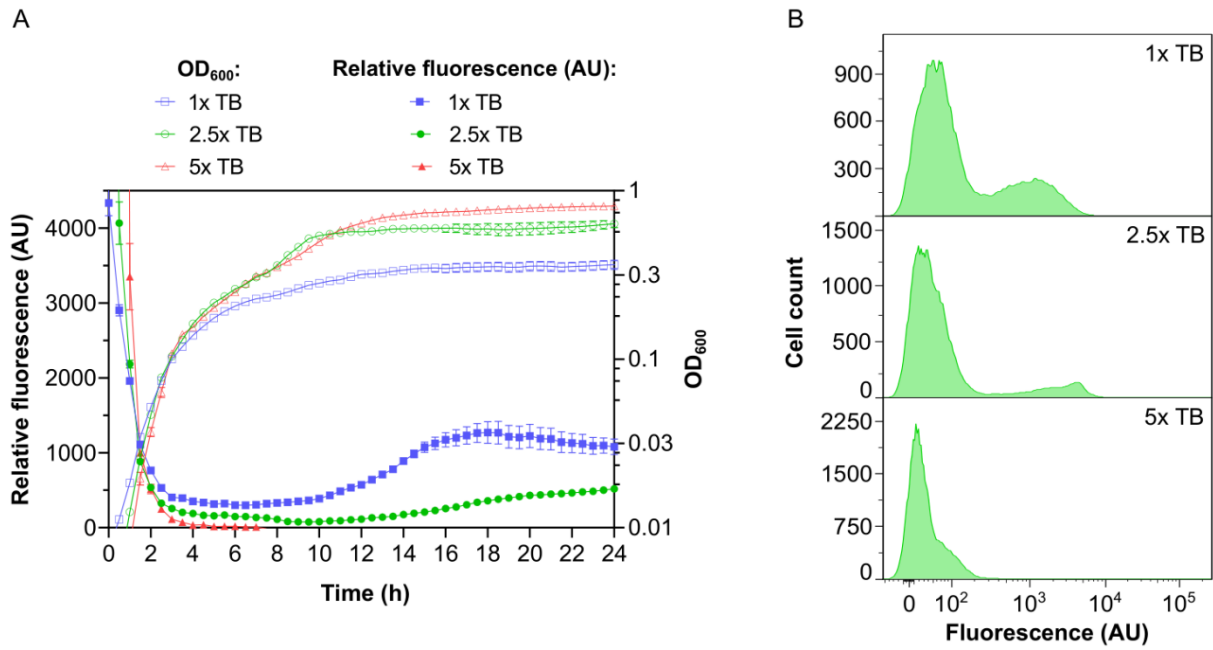

**S1 Fig. Dependence of curli gene expression on nutrient levels.** Wild-type *E. coli* cultures were grown as in Fig 1A (except shaking conditions) but with different indicated concentrations of TB. **(A)** Bacterial growth and activity of transcriptional curli reporter. Error bars indicate SEM of 6 technical replicates. **(B)** Distribution of single-cell fluorescence levels after 24 h of growth in a plate reader measured by flow cytometry. Note that the scale in the y axes is different for individual conditions to improve readability.
