# Supplementary material for: Regulation by cyclic di-GMP attenuates dynamics and enhances robustness of bimodal curli gene activation in Escherichia coli
Source: PubMed Central journal article supplement (PMC10212085; doi:10.1371/journal.pgen.1010750), 2023-05-15
Supplement: pgen.1010750.s005.pdf [file pgen.1010750.s005.pdf]

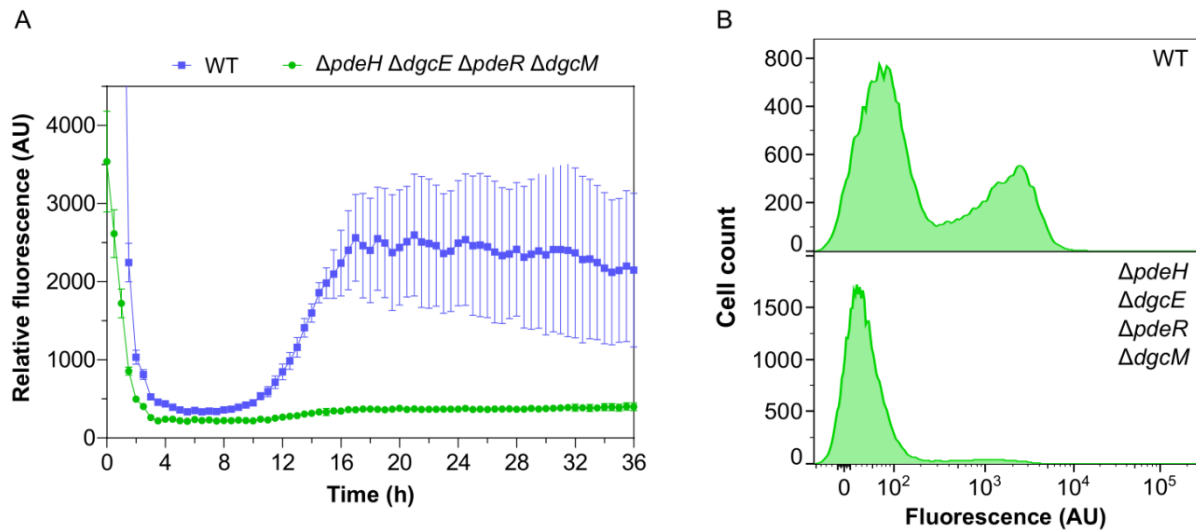

**S4 Fig. Curli gene expression upon prolonged cultivation in a plate reader.** Wild-type (WT) and  $\Delta pdeH \Delta dgcE \Delta pdeR \Delta dgcM$  strains were grown in TB in a plate reader as in S3 Fig, but during 36 h. **(A)** Induction of transcriptional curli reporter. Error bars indicate SEM of 10 technical replicates. **(B)** Distribution of single-cell fluorescence levels in populations of both strains after 36 h of growth measured by flow cytometry.
