# Supplementary material for: Regulation by cyclic di-GMP attenuates dynamics and enhances robustness of bimodal curli gene activation in Escherichia coli
Source: PubMed Central journal article supplement (PMC10212085; doi:10.1371/journal.pgen.1010750), 2023-05-15
Supplement: pgen.1010750.s007.pdf [file pgen.1010750.s007.pdf]

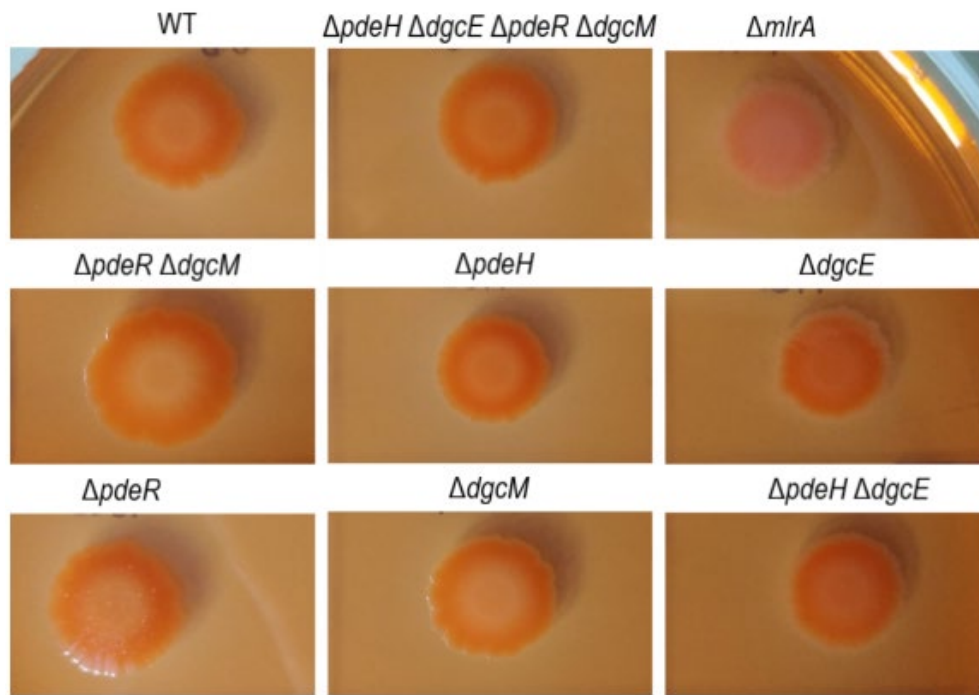

**S6 Fig. Curli expression in macrocolony biofilms.** Images of macrocolonies of indicated strains after 8 days of growth on salt-free LB agar plates.
