# Supplementary material for: Regulation by cyclic di-GMP attenuates dynamics and enhances robustness of bimodal curli gene activation in Escherichia coli
Source: PubMed Central journal article supplement (PMC10212085; doi:10.1371/journal.pgen.1010750), 2023-05-15
Supplement: pgen.1010750.s009.pdf [file pgen.1010750.s009.pdf]

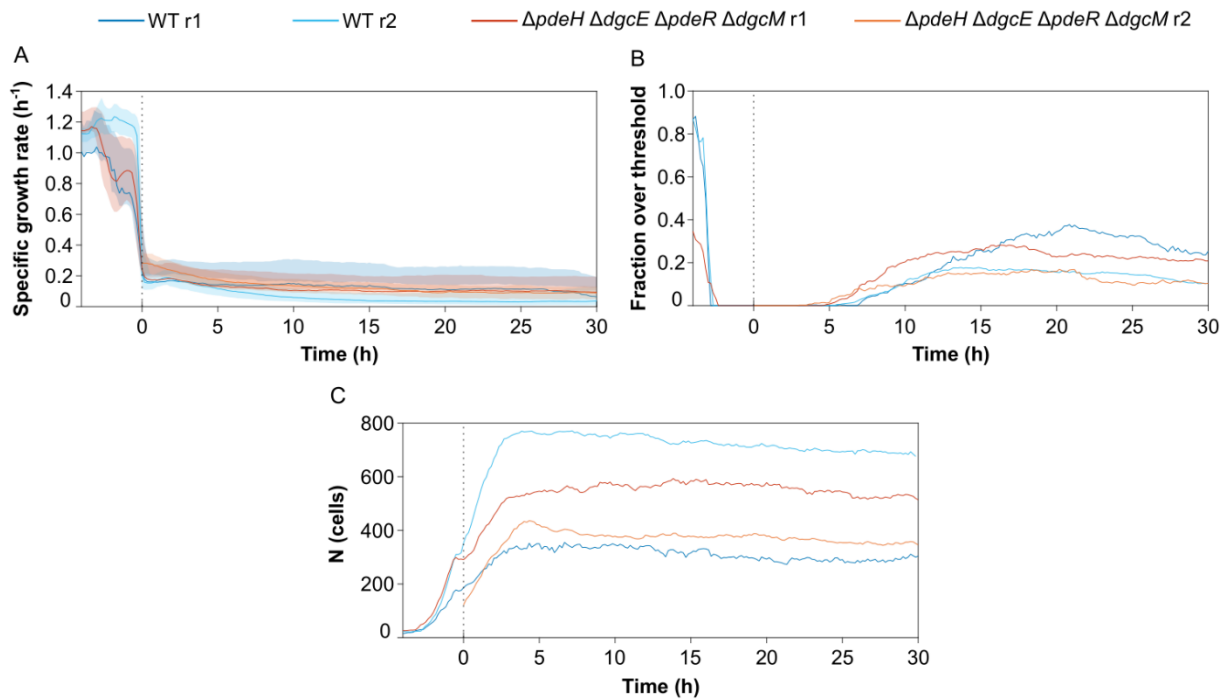

**S8 Fig. Growth rates and fraction of curli expressing cells over time.** Stationary phase cells were introduced into mother machine devices, supplied with fresh medium and then switched to conditioned medium after 4 h of growth, as in Fig 6. **(A)** Median instantaneous growth rates for the wild-type and for the  $\Delta pdeH \Delta dgcE \Delta pdeR \Delta dgcM$  strain disabled in c-di-GMP regulation. Growth rate drops rapidly and cells switch on curli expression after a switch to conditioned medium. Shaded area is interquartile range. **(B)** Fraction of cells with fluorescence exceeding 1000 units. **(C)** Number of detected cells. Two biological replicates (r1 and r2) were performed for each strain; data for the r1 replicate are also shown in Figure 6. Note that in the r2 experiment for the quadruple deletion strain, cells were only imaged after medium switching.
