# Supplementary material for: Regulation by cyclic di-GMP attenuates dynamics and enhances robustness of bimodal curli gene activation in Escherichia coli
Source: PubMed Central journal article supplement (PMC10212085; doi:10.1371/journal.pgen.1010750), 2023-05-15
Supplement: pgen.1010750.s010.pdf [file pgen.1010750.s010.pdf]

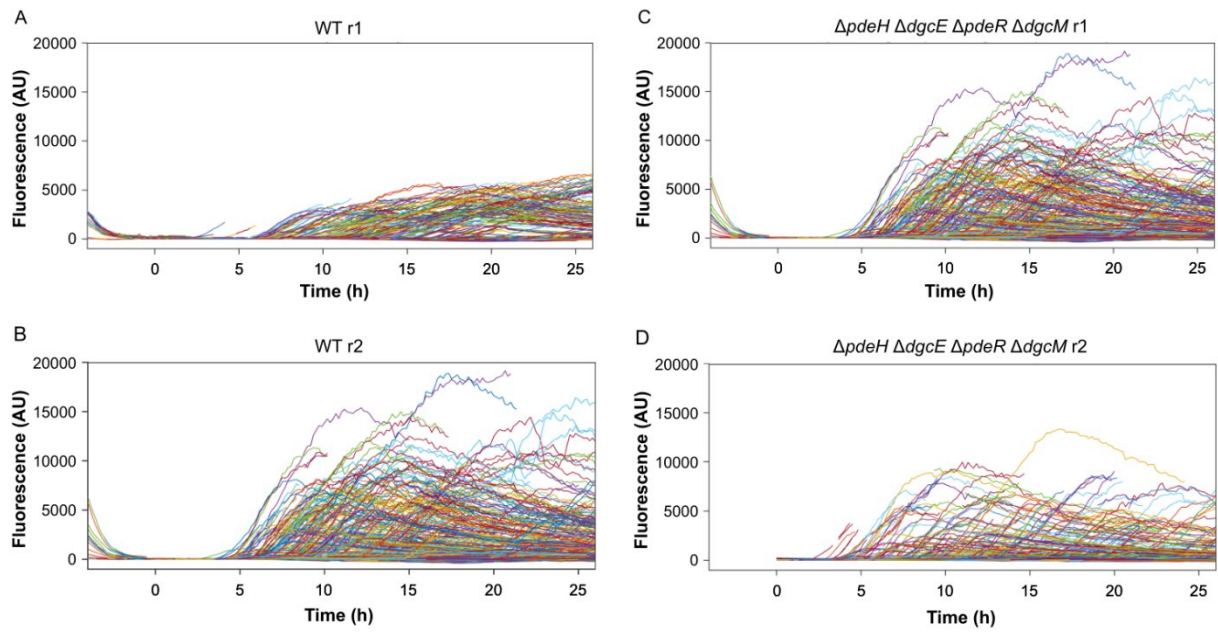

**S9 Fig. Single-cell traces of cell fluorescence for all cells for the wild-type and for the c-di-GMP-regulation disabled strain. Data are from the same biological replicates (r1 and r2) as in S8 Fig.**
